# Supplementary material
Source: publisher figshare collection journal article supplement (https://karger.figshare.com/articles/dataset/_/6181757)
Supplement: Supplementary file 1 [file 1]

Archive with 2 entries (2 files):
- OCL488201_FigS1-S6.pdf
- OCL488201_TableS1-S2.pdf
