# Supplementary material
Source: publisher figshare collection journal article supplement (https://karger.figshare.com/articles/dataset/_/6181757)
Supplement: Supplementary file 1 [file 1 › OCL488201_FigS1-S6.pdf]

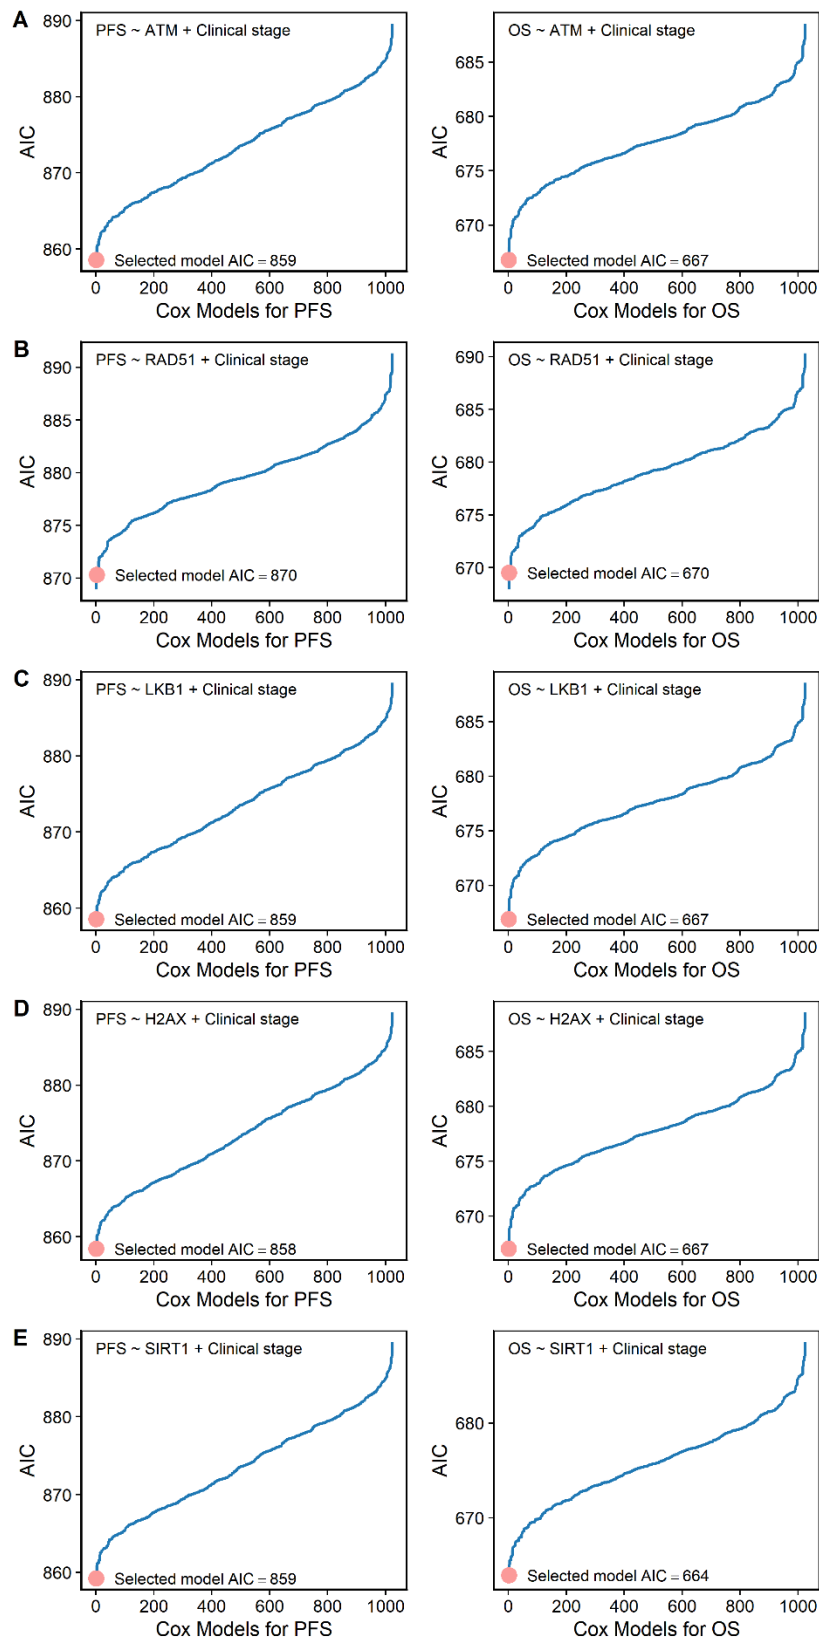

Figure S1. Cox proportional hazards regression models ( $n = 1024$ ) for PFS and OS, including all possible combinations of 9 covariates and the individual expression statuses of the following biomarkers: ATM (A), RAD51 (B), LKB1 (C), H2AX (D), and SIRT1 (E). The pink dot indicates the optimal model, selected using an exhaustive screening algorithm. The model formulas are displayed in the left upper corners of the panels. AIC, Akaike information criterion; PFS, progression-free survival; OS, overall survival.

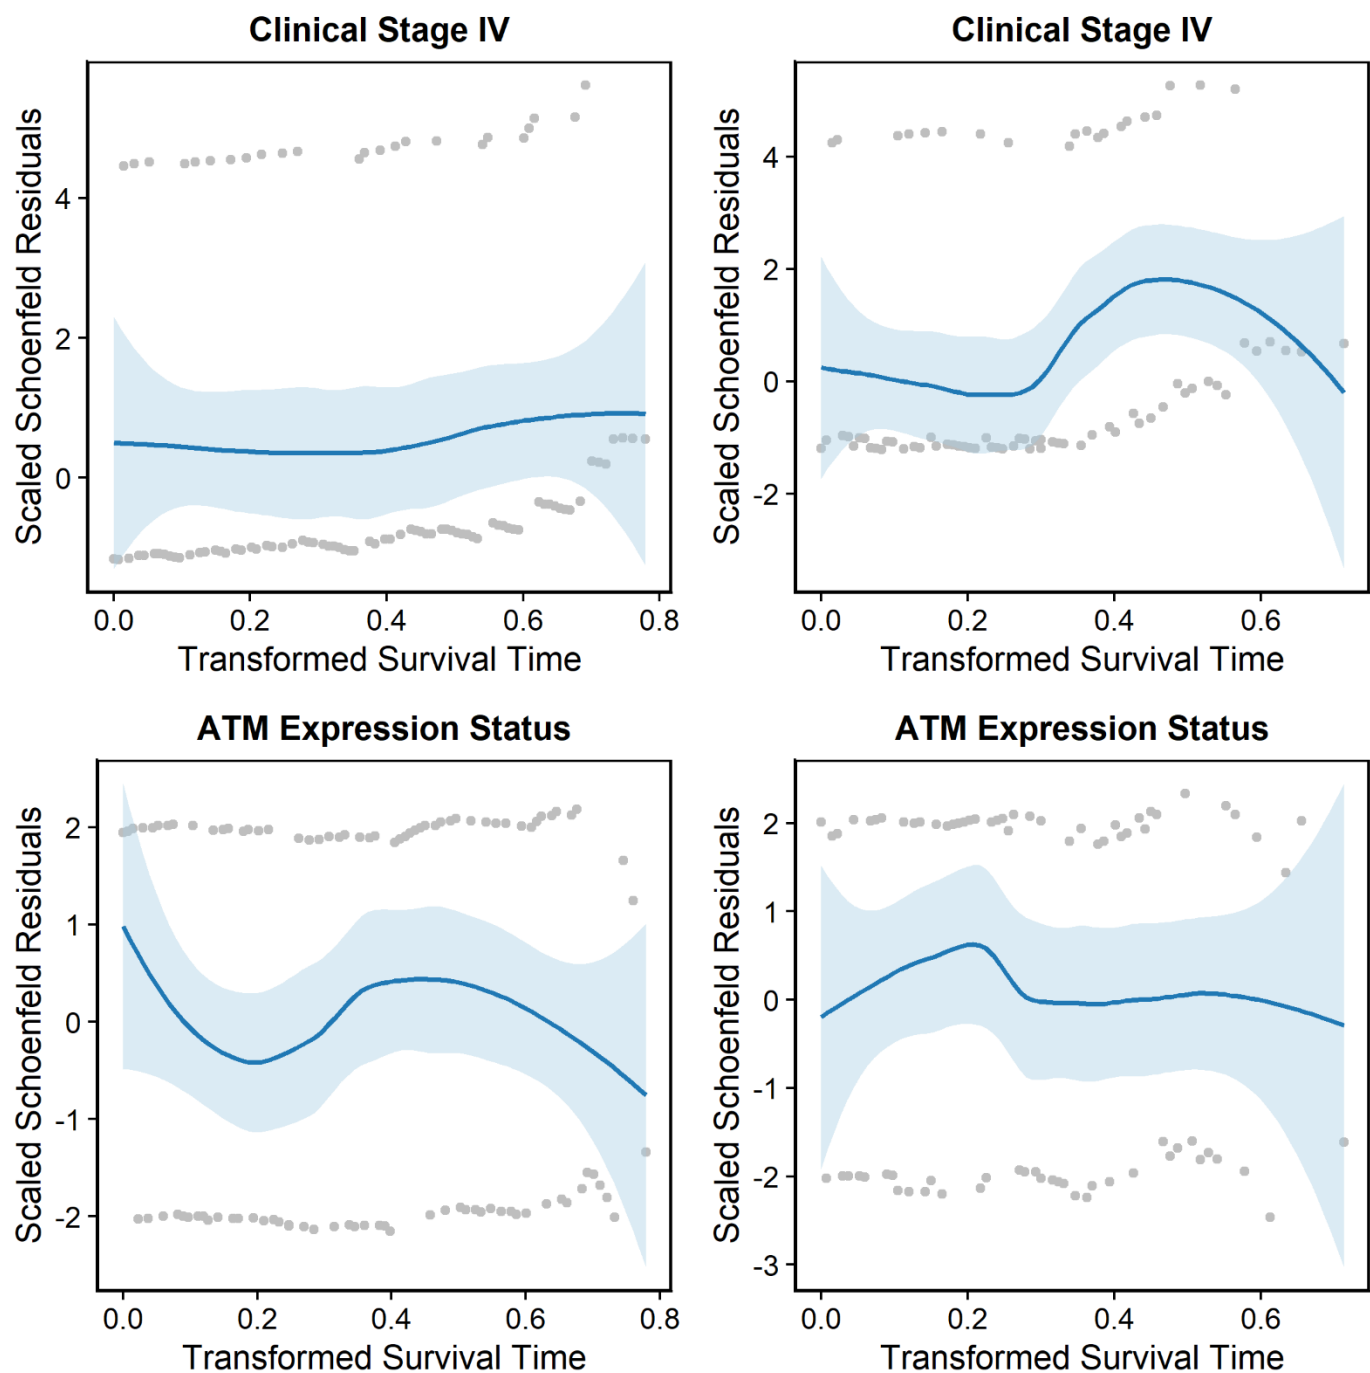

Figure S2. Scatterplots of scaled Schoenfeld residuals vs. transformed survival times for each indicator variable included in the optimal multivariable Cox models for progression-free survival (left panels) and overall survival (right panels). The ATM expression status was set as a fixed predictor variable. Blue lines and shading indicate locally weighted scatterplot smoothing curves and 95% confidence intervals, respectively.

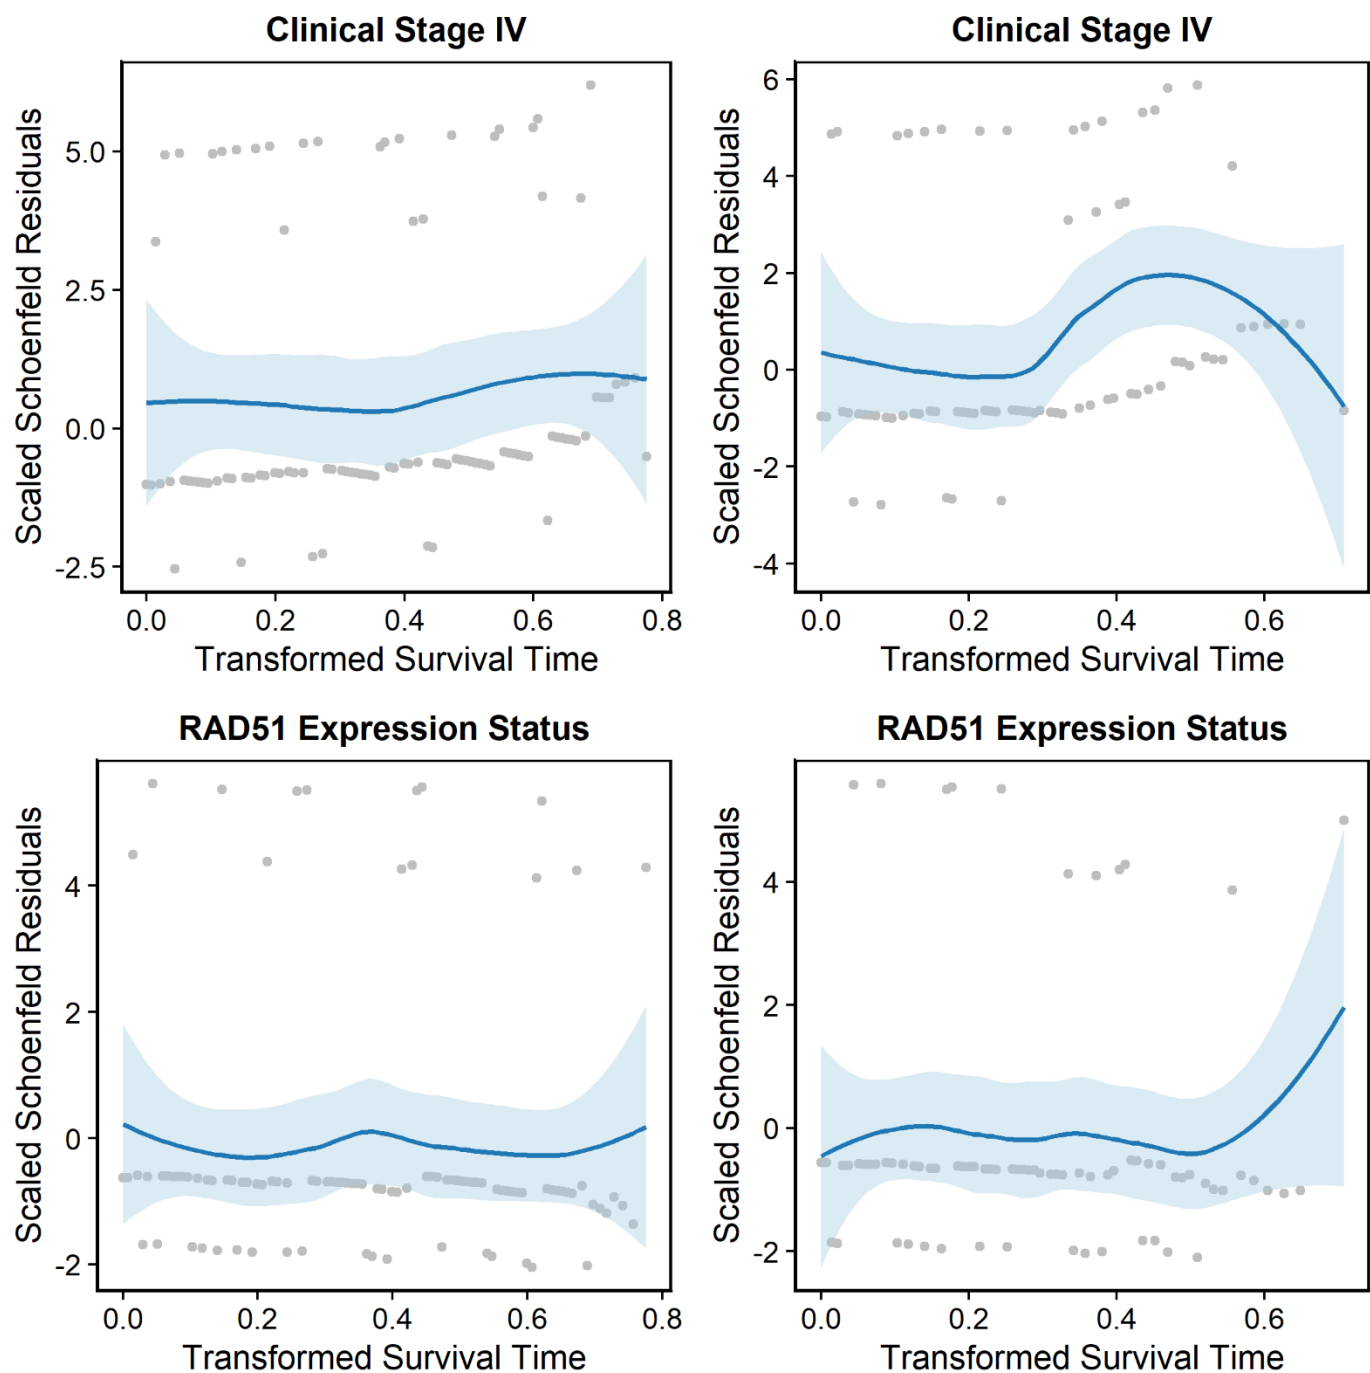

Figure S3. Scatterplots of scaled Schoenfeld residuals vs. transformed survival times for each indicator variable included in the optimal multivariable Cox models for progression-free survival (left panels) and overall survival (right panels). The RAD51 expression status was set as a fixed predictor variable. Blue lines and shading indicate locally weighted scatterplot smoothing curves and 95% confidence intervals, respectively.

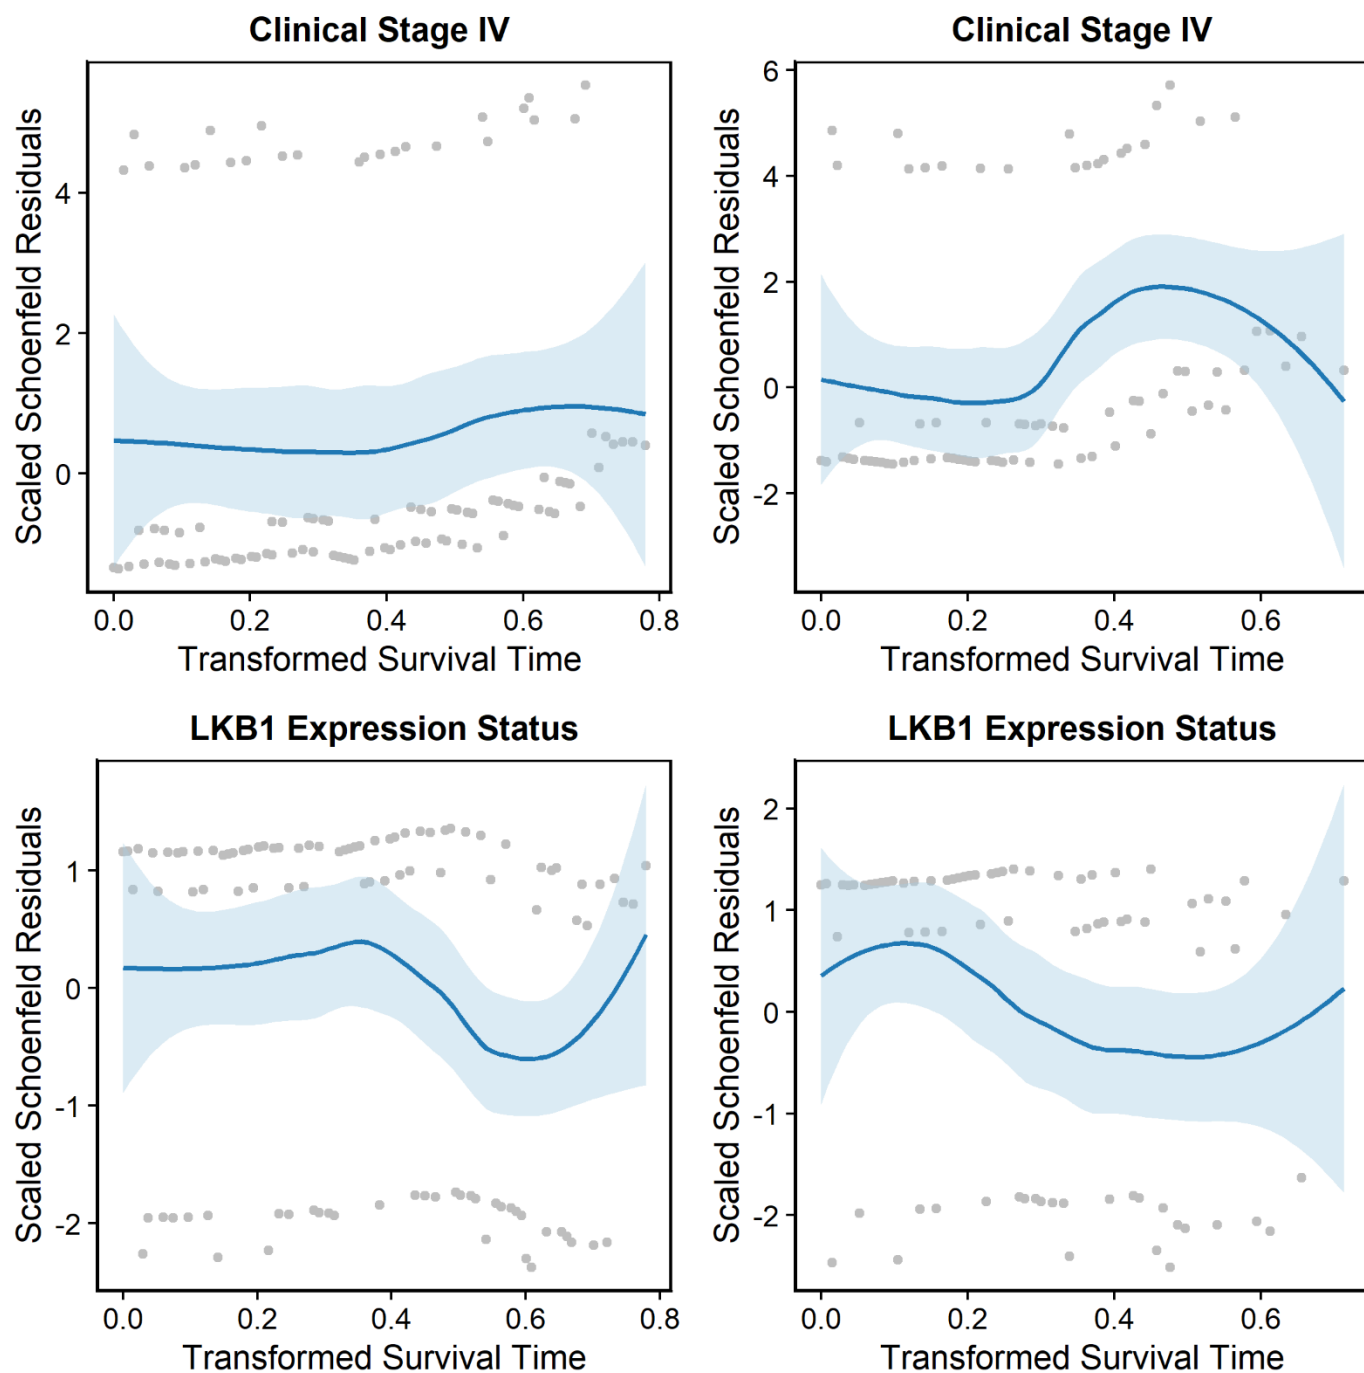

Figure S4. Scatterplots of scaled Schoenfeld residuals vs. transformed survival times for each indicator variable included in the optimal multivariable Cox models for progression-free survival (left panels) and overall survival (right panels). The LKB1 expression status was set as a fixed predictor variable. Blue lines and shading indicate locally weighted scatterplot smoothing curves and 95% confidence intervals, respectively.

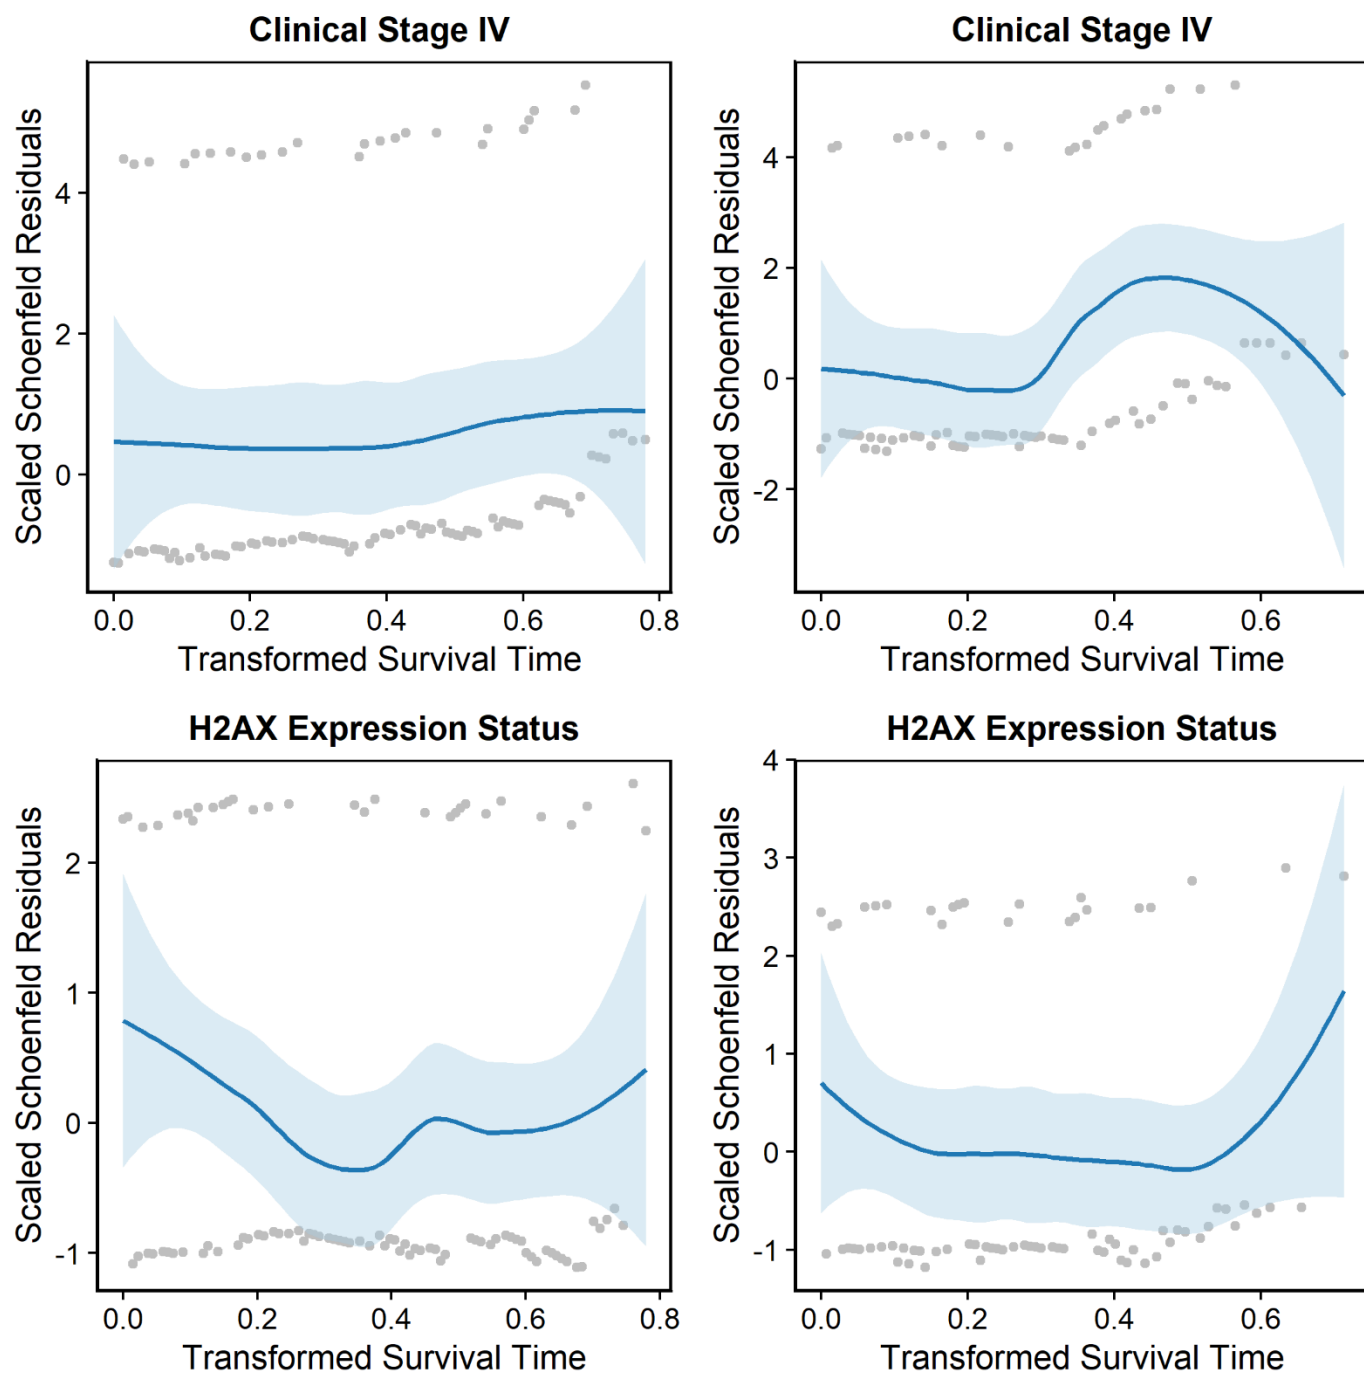

Figure S5. Scatterplots of scaled Schoenfeld residuals vs. transformed survival times for each indicator variable included in the optimal multivariable Cox models for progression-free survival (left panels) and overall survival (right panels). The H2AX expression status was set as a fixed predictor variable. Blue lines and shading indicate locally weighted scatterplot smoothing curves and 95% confidence intervals, respectively.

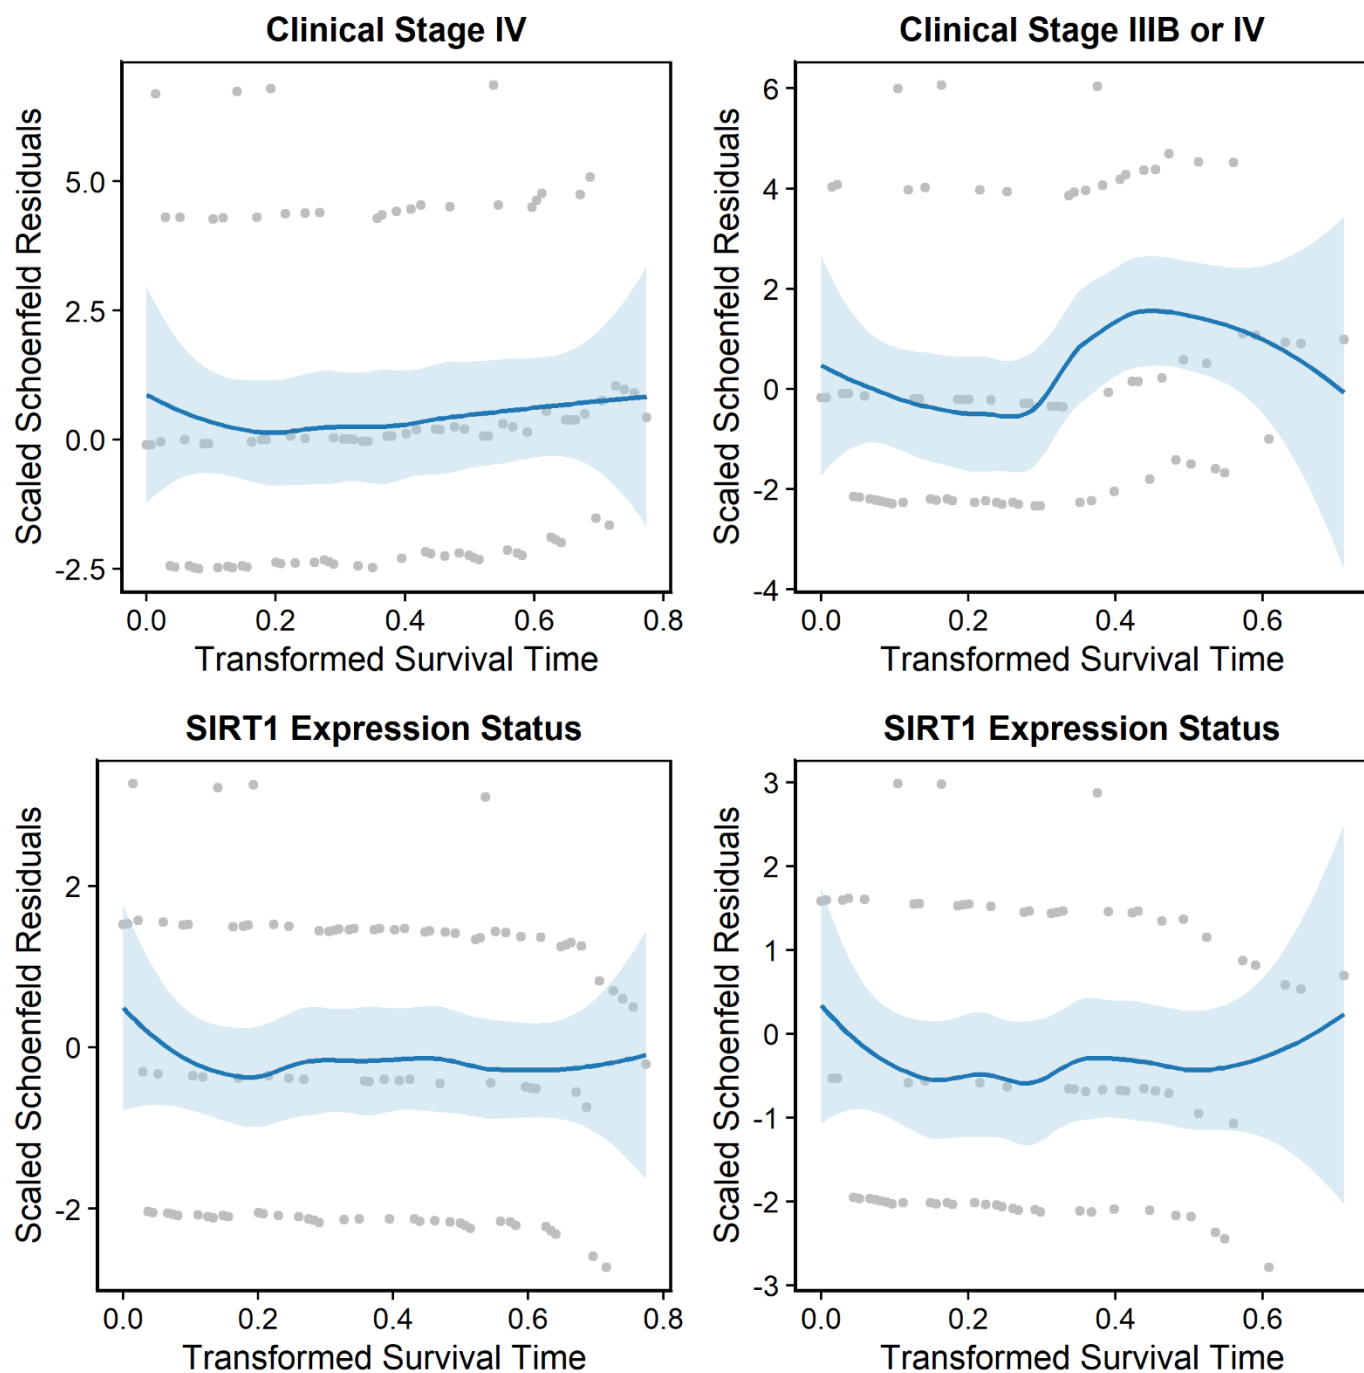

Figure S6. Scatterplots of scaled Schoenfeld residuals vs. transformed survival times for each indicator variable included in the optimal multivariable Cox models for progression-free survival (left panels) and overall survival (right panels). The SIRT1 expression status was set as a fixed predictor variable. Blue lines and shading indicate locally weighted scatterplot smoothing curves and 95% confidence intervals, respectively.
