# Supplementary material
Source: publisher figshare collection journal article supplement (https://karger.figshare.com/articles/dataset/_/6181757)
Supplement: Supplementary file 1 [file 1 › OCL488201_TableS1-S2.pdf]

Table S1. Sensitivity analysis of the prognostic impact of SIRT1 using Cox models

| Cox model formula <sup>a)</sup>                             | HR (95% CI)      | <i>P</i> |
|-------------------------------------------------------------|------------------|----------|
| OS ~ SIRT1 + Clinical stage <sup>b)</sup>                   | 0.58 (0.35-0.97) | 0.037    |
| OS ~ SIRT1 + Clinical stage + Chemoresponse                 | 0.62 (0.37-1.03) | 0.065    |
| OS ~ SIRT1 + Clinical stage + ypN                           | 0.6 (0.35-1)     | 0.051    |
| OS ~ SIRT1 + Clinical stage + Smoking                       | 0.58 (0.34-0.96) | 0.034    |
| OS ~ SIRT1 + Clinical stage + Chemoresponse + ypN           | 0.64 (0.38-1.09) | 0.101    |
| OS ~ SIRT1 + Clinical stage + Chemoresponse + Smoking       | 0.61 (0.36-1.02) | 0.058    |
| OS ~ SIRT1 + Clinical stage + ypN + Smoking                 | 0.58 (0.34-0.99) | 0.046    |
| OS ~ SIRT1 + Clinical stage + Chemoresponse + ypN + Smoking | 0.63 (0.37-1.08) | 0.091    |

<sup>a)</sup>Clinical stage was dichotomized into I-III and IV, chemoresponse into CR/PR and SD/PD, ypN into 0-1 and 2-3, and smoking into the never-smoker and the current or ex-smoker.

<sup>b)</sup>This is the selected optimal model displayed in Table 3.

HR, hazard ratio; 95% CI, 95% confidence interval; OS, overall survival; SIRT1, Silent mating-type information regulation 2 homologue 1; ypN, pathological N stage.

Table S2. Grambsch and Therneau test p-values of the correlation between the scaled Schoenfeld residuals versus transformed survival time for each optimal multivariable Cox model

| Markers | Variables                            | Model for PFS         |                 | Model for OS          |                 |
|---------|--------------------------------------|-----------------------|-----------------|-----------------------|-----------------|
|         |                                      | Per-variable <i>P</i> | Global <i>P</i> | Per-variable <i>P</i> | Global <i>P</i> |
| ATM     | ATM-high versus ATM-low              | 0.834                 | 0.776           | 0.791                 | 0.148           |
|         | Clinical stage IV versus I-III       | 0.497                 |                 | 0.052                 |                 |
| RAD51   | RAD51-positive versus RAD51-negative | 0.849                 | 0.754           | 0.961                 | 0.139           |
|         | Clinical stage IV versus I-III       | 0.453                 |                 | 0.057                 |                 |
| LKB1    | LKB1-positive versus LKB1-negative   | 0.095                 | 0.197           | 0.033                 | 0.016           |
|         | Clinical stage IV versus I-III       | 0.406                 |                 | 0.027                 |                 |
| H2AX    | H2AX-positive versus H2AX-negative   | 0.239                 | 0.395           | 0.717                 | 0.143           |
|         | Clinical stage IV versus I-III       | 0.478                 |                 | 0.051                 |                 |
| SIRT1   | SIRT1-positive versus SIRT1-negative | 0.746                 | 0.781           | 0.801                 | 0.181           |
|         | Clinical stage IV versus I-III       | 0.665                 |                 | 0.106                 |                 |

PFS, progression-free survival; OS, overall survival; SIRT1, Silent mating-type information regulation 2

homologue 1.
